# Supplementary material
Source: MDPI journal article supplement (https://www.mdpi.com/1661-3821/4/1/1)
Supplement: s1 [file s1]

Supplementary Material:

**Table S1.** Fatty acid composition of oil extracts from GLM obtained in fresh and commercial powder.

| Class         | Free Fatty Acids | Organic Solvent    |              | <i>P-value</i> |       |
|---------------|------------------|--------------------|--------------|----------------|-------|
|               |                  | Fresh              | Commercial   |                |       |
|               |                  | Mean±SD (mg/g)     |              |                |       |
| PUFA          | ω-3              | cis-18:3n-3 (ALA)  | 4.15±1.71•   | 8.3±0.07•      | 0.05  |
|               |                  | cis-20:3n-3 (ETE)  | 0.23±0.006   | 1.12±0.08      |       |
|               |                  | cis-20:5n-3 (EPA)  | 52.03±0.006* | 45.36±2.91*    | 0.03  |
|               |                  | cis-22:6n-3 (DHA)  | 78.46±2.19 ° | 24.84±6.49 °   | 0.002 |
|               | ω-5              | cis-14:1n-5        | 0.08±0.001   | 0.04±0.0001    |       |
|               | ω-6              | trans-18:2n-6      | 4.98±2.57    | 4.87±0.006     |       |
|               |                  | cis-18:3n-6 (GLA)  | 0.3±0.01     | 0.15±0.002     |       |
|               |                  | cis-20:2n-6        | 1.05±0.12    | 2.28±0.003     |       |
|               |                  | cis-20:3n-6 (DGLA) | 0.4±0.02     | 0.26±0.0001    |       |
|               |                  | cis-20:4n-6 (AA)   | 6.1±2.7      | 4.42±0.006     |       |
|               | ω-7              | cis-16:1n-7        | 22.52±50.74  | 22.73±7.09     |       |
|               | ω-9              | trans-18:1n-9      | 7.1±6.07     | 6.44±0.12      |       |
|               |                  | cis-22:1n-9        | 0.16±0.004   | 0.41±0.005     |       |
| Monosaturated |                  | cis-20:1n-9        | 9.39±8.99    | 4.23±0.004     |       |
|               |                  | cis-24:1n-9        | 0.16±0.002   | 0.1±0.0003     |       |
|               |                  | 06:0               | 0.003±0      | 0.003±0        |       |
| Saturated     |                  | 08:0               | 0.005±0      | 0.01±0         |       |
|               |                  | 10:0               | 0.006±0      | 0.01±0         |       |
|               |                  | 11:0               | 0.004±0      | 0.04±0         |       |
|               |                  | 12:0               | 0.07±0.002   | 0.14±0.0004    |       |
|               |                  | 13:0               | 0.25±0.02    | 0.2±0.003      |       |
|               |                  | 14:0               | 15.51±35.82  | 16.12±0.79     |       |
|               |                  | 15:0               | 2.75±0.97    | 1.07±0.05      |       |
|               |                  | 16:00              | 67.4±3.95 √  | 35.5±55.55 √   | 0.02  |
|               |                  | 17:0               | 3.38±1.14    | 1.51±0.08      |       |
|               |                  | 18:0               | 14.26±17.7   | 8.55±2.26      |       |
|               |                  | 20:0               | 0.53±0.03    | 0.12±0.0004    |       |
|               |                  | 21:0               | 0.04±0.0002  | 0.01±0         |       |
|               |                  | 22:00              | 0.35±0.01    | 0.11±0.0003    |       |
|               |                  | 23:00              | 0.08±0.0005  | 0.02±0         |       |
|               |                  | 24:00              | 0.41±0.01    | 0.11±0.0003    |       |

P value\* = the difference between the groups' mean is statistically significant based on ANOVA (P< 0.05). Letters and symbols = The difference between samples is statistically significant based on the Tukey test.
